# Supplementary material
Source: publisher figshare collection journal article supplement (https://karger.figshare.com/ndownloader/files/10683157)
Supplement: Supplementary file 1 [file 10683157]

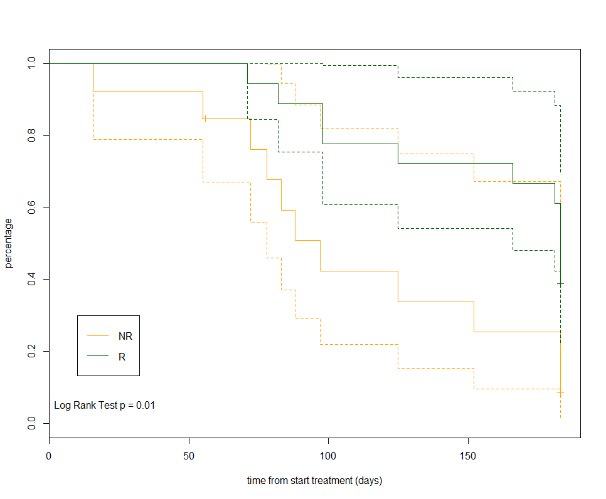


*NR: non-responder; R: responder. Dotted curves represent confidence intervals*

Figure 1 Suppl. Estimated Kaplan-Meier curve for overall survival comparing responders and non-responders for the 31 patients in the study.
